# Supplementary material
Source: publisher site journal article supplement (https://www.dovepress.com/article/368262)
Supplement: Supplementary file 1 [file get_supplementary_file.php]

| **Drug** | **Related issue** | **Quotes examples** |
| --- | --- | --- |
| Narcotics | Dispensing without a prescription | “The biggest problem is ordering narcotic drugs without a prescription, and we do not distinguish between patients and addicts.” Pharmacist No. 5 |
| Misoprostol and teratogenic | Facilitating abortion | “I heard that there are patients who may try to take medication for abortion in an irregular way. There was a request by a colleague, but he dealt with the matter after conducting investigations, and they knew at the time that the medicine had been used illegally.” Pharmacist No. 11 |
| Metformin and Cidophage | Patients request the expensive drugs | “Some people are accustomed to a particular medicine such as Metformin and Cidophage, even if the alternative is cheaper, so, what can I do?” Pharmacist No. 17 |
| Augmentin | Prescribing a costly medicine when a less priced alternative is available | “Many doctors prescribe Augmentin which is around 70 riyals, and there are alternatives to it at 21 riyals, even though they are the same doses.” Pharmacist No. 17 |
| Cyproheptadine | Hiding information from the patient for his benefit | “There is an anti-allergy called Cyproheptadine which could cause problems to liver and kidney. However, it has an off-label use (appetite stimulant), so I told people that this drug is not available although it is available” Pharmacist No. 16 |
| Pregabalin and gabapentin | Refusal to dispense medication due to doubts about the validity of the prescription | “In the hospital, I sometimes refused to dispense gabapentin, or Lyrica, because I knew that some of the prescriptions were fake and that the medicine was used in a bad way that could threaten the patient's life.” Pharmacist No. 18 |
| Cosmetics | Cross-selling phenomenon | “One pharmacists told me that a patient came to the pharmacy with a skin allergy. Literally, he only needed one medicine to treat the issue, but the pharmacist gave him 14 products of unnecessary shampoo, creams, oils, fingernail cutter and the pharmacist would claim that the products the patient used before he came to the pharmacy were the ones that caused him to have an allergy, so he must change them.” Pharmacist No. 13 |
| OTC drugs | Selling the most expensive product because it leads to a financial reward | “We have a monthly target and a product list for OTC drugs, but it is not compulsory upon us to meet this target, although we may lose the bonus.” Pharmacist No. 17 |
| Atorvastatin | For chronic medications, there is often little pricing variation across companies | “The price of drugs for chronic conditions, such as blood pressure and diabetes medications, are almost uniform from the Food and Drug Authority. Like Atorvastatin, its price is the same, even though it is from two different companies.” Pharmacist No. 16 |
| Melatonin and Valerian | Patients' preference for cheaper medicine | “Like the patient a little while ago (a customer who interrupted the interview to ask for medicine for insomnia) asked for a treatment for his sleep problem. I offered him the Melatonin for 171 riyals. He refused and said is there an alternative. I offered Valerian for 55 riyals, and he agreed and took it.” Pharmacist No. 16 |
| Laxatives, erectile dysfunction drug, and pregnancy test kit | Some patients are ashamed to speak aloud about their medications due to the limited space in the pharmacy | “There are many patients who are ashamed to ask for some medicines to the point that they call me in the corner of the pharmacy, especially when they are prescribed sexual medicines or even a pregnancy test for women.” Pharmacist No. 14 |
| Panadol and antipyretics | Giving the patient the drug under the brand name he requested without any other advice | “If a sick person wants Panadol, I will give it to him, without advising him about the other options, but if a patient comes and says I want an antipyretic, I will give him the available options and explain to him the price difference.” |
| Antibiotics | The Ministry of Health tests pharmacists by sending them fake patients | “From time to time, the Ministry of Health sends a fake patient to test how you act, for example, to see if you dispense antibiotics without a prescription or something else, and they will fine you if you do not pass the test.” Pharmacist No. 14 |
| Immunosuppressive drugs | Sometimes it is better to hide some information from the patient regarding the drug | “While hiding some information from patients, I must compensate with other information that prevents them from being harmed by hiding this data. For example, immunosuppressive drugs—ethically, it is not correct for me to hide information, but if I knew that the patient who I gave this advice could abandon the drug which could cause him to have secondary complications, then I might have to hide some information and give him secondary advice to avoid the causes of infection.” Pharmacist No. 7 |
| Hydroxyurea | Sometimes it is better to hide some information from the patient regarding the drug | “Another example is hydroxyurea, if you tell the patient that this drug causes cancer in the skin, it is impossible that patient will take it.” Pharmacist No. 8 |
| Medical lenses | Selling a specific company's product for personal interest | “Personally, one company offered me the marketing of medical lenses, and I see that this phenomenon is widespread in the pharmaceutical community.” |
| Clexane | Not dispensing medicine for a religious reason, such as the presence of pork derivatives | “Medicine contains something from pig, like Clexane…this is really subjective, so you cannot deceive the patient.” Pharmacist No. 8 |

Supplementary Table 1: Drug-Related Ethical Dilemmas
